# Supplementary material for: Long-Term Clinical Outcomes of a Remote Digital Musculoskeletal Program: An Ad Hoc Analysis from a Longitudinal Study with a Non-Participant Comparison Group
Source: MDPI journal article supplement (doi:10.3390/healthcare10122349), 2022-11-23
Supplement: s1 [file s1]

# Long-term clinical outcomes of a remote digital musculo-skeletal program: an ad hoc analysis from a longitudinal study with a non-participant comparison group

Anabela C. Areias, Fabíola Costa, Dora Janela, Maria Molinos, Robert G. Moulder, Jorge Lains, Justin K. Scheer, Virgílio Bento, Vijay Yanamadala, Fernando Dias Correia

**Supplementary Table S1** - Effect of each covariate in the odds for being a responder for pain and functionality.

| Outcome       | Model               | Parameter                   | Estimate | SE   | OR   | 95%CI     | z     | p     |
|---------------|---------------------|-----------------------------|----------|------|------|-----------|-------|-------|
| Pain          | IPW + Entire cohort | (Intercept)                 | 0.39     | 0.66 | 1.48 | 0.41 5.35 | 0.59  | 0.554 |
|               |                     | Intervention                | 0.62     | 0.21 | 1.85 | 1.22 2.81 | 2.90  | 0.004 |
|               |                     | Age                         | 0.00     | 0.01 | 1.00 | 0.98 1.02 | 0.29  | 0.774 |
|               |                     | BMI                         | -0.02    | 0.01 | 0.98 | 0.95 1.01 | -1.37 | 0.170 |
|               |                     | Gender=men                  | 0.27     | 0.21 | 1.31 | 0.87 1.97 | 1.31  | 0.190 |
|               |                     | Pain                        | 0.12     | 0.06 | 1.12 | 1.00 1.26 | 2.01  | 0.045 |
|               |                     | PHQ-9                       | -0.01    | 0.03 | 0.99 | 0.93 1.06 | -0.24 | 0.809 |
|               |                     | GAD-7                       | -0.06    | 0.03 | 0.95 | 0.89 1.01 | -1.76 | 0.079 |
|               |                     | Invasive and emergency care | -0.43    | 0.39 | 0.65 | 0.30 1.39 | -1.12 | 0.264 |
|               |                     | Conservative treatment      | -0.22    | 0.27 | 0.80 | 0.47 1.36 | -0.81 | 0.418 |
|               | IPW + Comp leters   | (Intercept)                 | 0.39     | 0.66 | 1.48 | 0.41 5.35 | 0.59  | 0.554 |
|               |                     | Intervention                | 0.62     | 0.21 | 1.85 | 1.22 2.81 | 2.90  | 0.004 |
|               |                     | Age                         | 0.00     | 0.01 | 1.00 | 0.98 1.02 | 0.29  | 0.774 |
|               |                     | BMI                         | -0.02    | 0.01 | 0.98 | 0.95 1.01 | -1.37 | 0.170 |
|               |                     | Gender=men                  | 0.27     | 0.21 | 1.31 | 0.87 1.97 | 1.31  | 0.190 |
|               |                     | Pain                        | 0.12     | 0.06 | 1.12 | 1.00 1.26 | 2.01  | 0.045 |
|               |                     | PHQ-9                       | -0.01    | 0.03 | 0.99 | 0.93 1.06 | -0.24 | 0.809 |
|               |                     | GAD-7                       | -0.06    | 0.03 | 0.95 | 0.89 1.01 | -1.76 | 0.079 |
|               |                     | Invasive and emergency care | -0.43    | 0.39 | 0.65 | 0.30 1.39 | -1.12 | 0.264 |
|               |                     | Conservative treatment      | -0.22    | 0.27 | 0.80 | 0.47 1.36 | -0.81 | 0.418 |
| Functionality | IPW + Entire cohort | (Intercept)                 | 0.67     | 0.63 | 1.96 | 0.57 6.71 | 1.07  | 0.286 |
|               |                     | Intervention                | 0.65     | 0.21 | 1.92 | 1.28 2.89 | 3.13  | 0.002 |
|               |                     | Age                         | 0.00     | 0.01 | 1.00 | 0.98 1.01 | -0.47 | 0.636 |
|               |                     | BMI                         | -0.03    | 0.01 | 0.97 | 0.95 1.00 | -2.09 | 0.037 |
|               |                     | Gender=men                  | -0.23    | 0.20 | 0.80 | 0.54 1.17 | -1.16 | 0.248 |
|               |                     | Pain                        | 0.07     | 0.05 | 1.07 | 0.96 1.19 | 1.29  | 0.196 |
|               |                     | PHQ-9                       | 0.03     | 0.03 | 1.03 | 0.96 1.10 | 0.78  | 0.433 |
|               |                     | GAD-7                       | -0.06    | 0.03 | 0.94 | 0.88 1.00 | -1.85 | 0.064 |

|                     |                             |       |      |      |      |       |       |       |
|---------------------|-----------------------------|-------|------|------|------|-------|-------|-------|
| IPW +<br>Completers | Invasive and emergency care | -1.02 | 0.41 | 0.36 | 0.16 | 0.80  | -2.49 | 0.013 |
|                     | Conservative treatment      | 0.34  | 0.27 | 1.40 | 0.83 | 2.37  | 1.27  | 0.203 |
|                     | (Intercept)                 | 0.47  | 0.69 | 1.60 | 0.41 | 6.20  | 0.68  | 0.499 |
|                     | Intervention                | 0.72  | 0.22 | 2.05 | 1.32 | 3.18  | 3.19  | 0.001 |
|                     | Age                         | 0.00  | 0.01 | 1.00 | 0.98 | 1.01  | -0.47 | 0.640 |
|                     | BMI                         | -0.02 | 0.02 | 0.98 | 0.95 | 1.01  | -1.16 | 0.244 |
|                     | Gender=men                  | -0.16 | 0.21 | 0.85 | 0.56 | 1.29  | -0.77 | 0.439 |
|                     | Pain                        | 0.04  | 0.06 | 1.04 | 0.93 | 1.17  | 0.71  | 0.480 |
|                     | PHQ-9                       | 0.03  | 0.04 | 1.04 | 0.96 | 1.12  | 0.90  | 0.368 |
|                     | GAD-7                       | -0.06 | 0.04 | 0.94 | 0.87 | 1.01  | -1.78 | 0.076 |
|                     | Invasive and emergency care | -0.86 | 0.46 | 0.42 | 0.17 | 1.04  | -1.88 | 0.060 |
|                     | Conservative treatment      | 0.28  | 0.28 | 1.33 | 0.76 | 2.309 | 1.002 | 0.316 |
